# Supplementary material for: mRNA-based CAR T-cells manufactured by miniaturized two-step electroporation produce selective cytotoxicity toward target cancer cells
Source: Royal Society of Chemistry journal article supplement (doi:10.1039/d1lc00219h), 2021-01-01
Supplement: d1lc00219h1.pdf [file d1lc00219h1.pdf]

## Supplementary Materials

### Supplementary figure S1

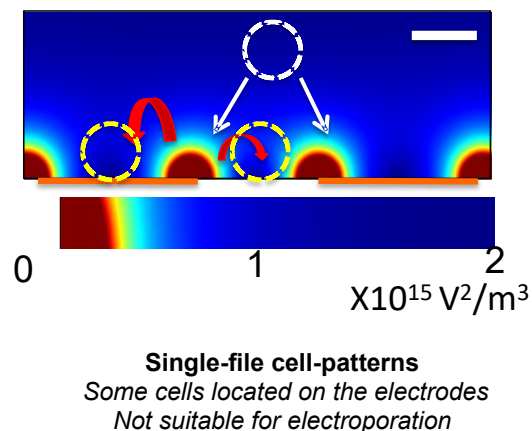

**Figure S1:** Calculated ( $\nabla E^2$ ) for the proper electric potential value (1 Vpp) but the incorrect dimensions for width of the electrodes. Electrode width:  $30\mu\text{m}$  and cell diameter:  $10\mu\text{m}$ . Scale bar indicates  $10\mu\text{m}$
